# Supplementary material for: Controlling silver morphology on a cramped optical fiber facet via a PVP-assisted silver mirror reaction for SERS fiber probe fabrication
Source: Royal Society of Chemistry journal article supplement (doi:10.1039/d1nj00284h), 2021-01-01
Supplement: d1nj00284h1.pdf [file d1nj00284h1.pdf]

# Controlling Silver Morphology on Cramped Optical Fiber Facet by PVP-assisted Silver Mirror Reaction for SERS Fiber Probe Fabrication

*Yuting Long, Hong Li\*, Xinxin Yang, Yufei Yuan, Mengjie Zheng*

\* Corresponding author. E-mail: lh\_648@whut.edu.cn

## Table of contents

1. XRD patterns and absorption spectra from ammonium hydroxide concentration experiments S2
2. XRD patterns and absorption spectra from silver nitrate concentration experiments S3
3. XRD patterns and absorption spectra from reducing saccharides experiments S4
4. XRD patterns and absorption spectra from pH values of Tollens solution experiments S5

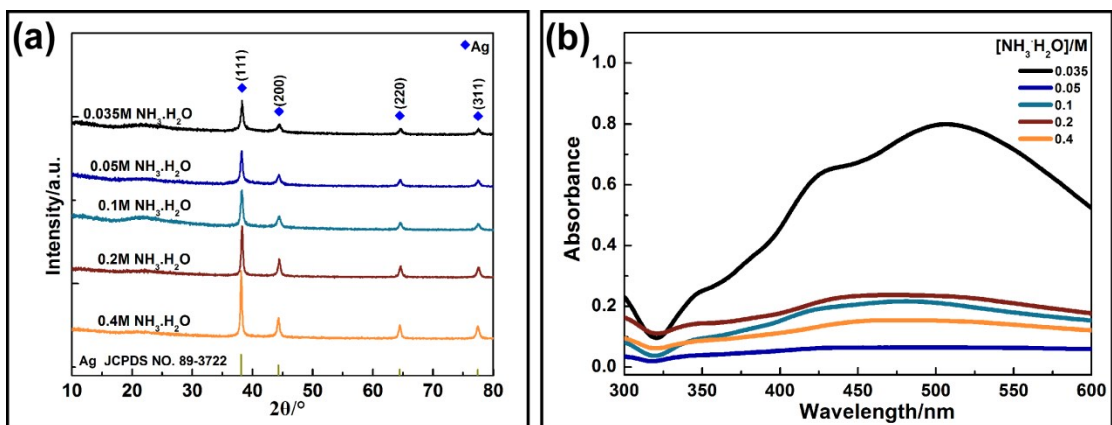

**Fig. S1.** XRD patterns (a) and UV-VIS absorption spectra (b) of silver synthesized with different concentrations of ammonium hydroxide (0.035, 0.05, 0.1, 0.2 and 0.4 mol/L).

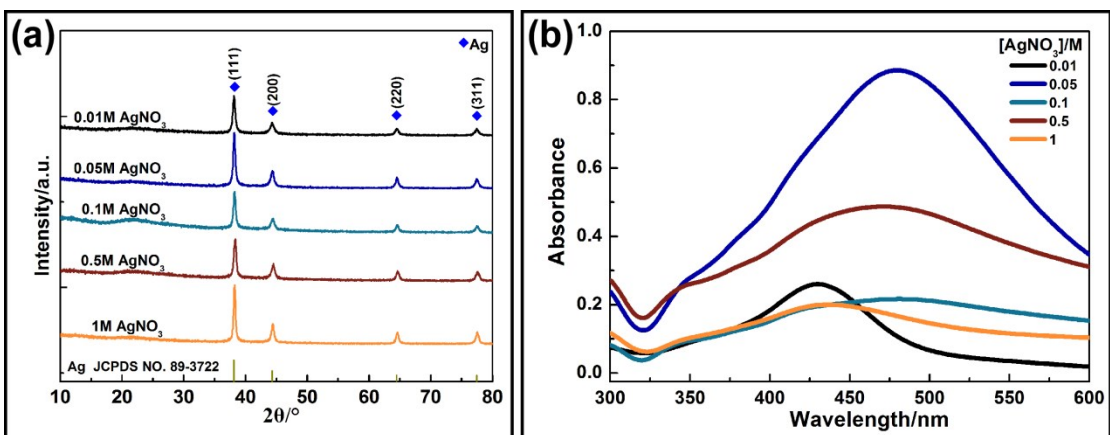

**Fig. S2.** XRD patterns (a) and UV-VIS absorption spectra (b) of silver synthesized with different concentrations of silver nitrate (0.01, 0.05, 0.1, 0.5 and 1 mol/L).

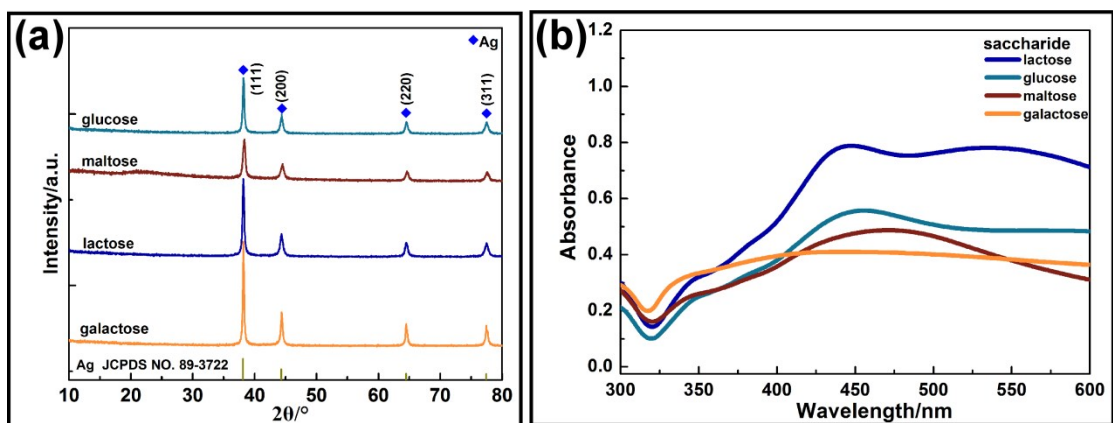

**Fig. S3.** XRD patterns (a) and UV-VIS absorption spectra (b) of silver synthesized with different reducing saccharides (glucose, maltose, lactose and galactose).

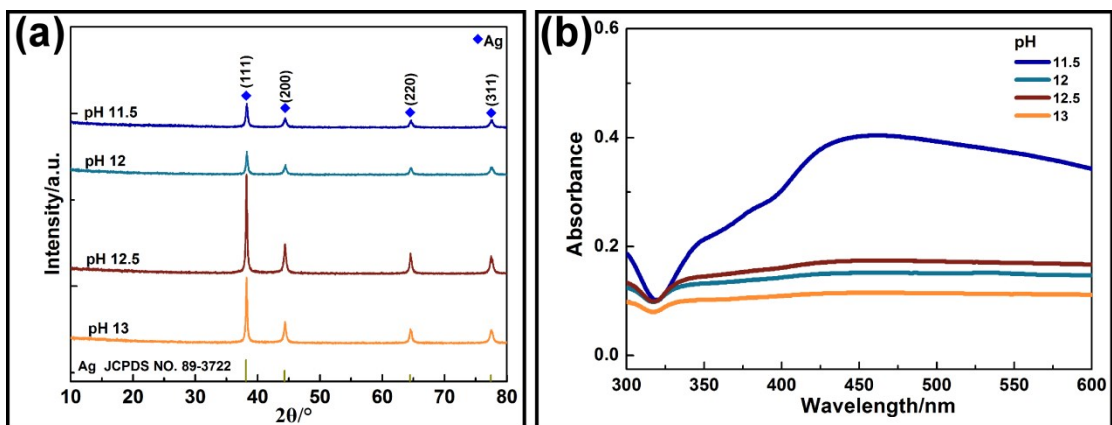

**Fig. S4.** XRD patterns (a) and UV-VIS absorption spectra (b) of silver synthesized with different pH values of Tollens solution (11.5, 12, 12.5 and 13).
